# Supplementary material for: A ZnS and metal hydroxide composite passivation layer for recombination control in high efficiency quantum dot sensitized solar cells
Source: Royal Society of Chemistry journal article supplement (doi:10.1039/c6ta08717e), 2016-01-01
Supplement: c6ta08717e1.pdf [file c6ta08717e1.pdf]

**Electronic Supporting Information (ESI)**

**ZnS and metal hydroxide composite passivation layer for recombination control  
in high efficiency quantum dot sensitized solar cells**

Zhenxiao Pan and Xinhua Zhong\*

College of Materials and Energy, South China Agricultural University, 483 Wushan Road,  
Guangzhou 510642, China

Email: zhongxh@ecust.edu.cn (X.Z.)

**Table S1** Average photovoltaic parameters of CdSeTe based QDSCs with addition of different concentration of Ga(NO<sub>3</sub>)<sub>3</sub> in Zn(OAc)<sub>2</sub> solution during ZnS treatment under the illumination of 1 full sun intensity (AM 1.5G, 100 mW/cm<sup>2</sup>).

| <b>Concentration</b> | <b><math>J_{sc}</math> (mA.cm<sup>-2</sup>)</b> | <b><math>V_{oc}</math> (V)</b> | <b>FF</b> | <b>PCE (%)</b> |
|----------------------|-------------------------------------------------|--------------------------------|-----------|----------------|
| 0 mM                 | 20.96                                           | 0.668                          | 0.634     | 8.88 ± 0.11    |
| 5 mM                 | 20.89                                           | 0.686                          | 0.637     | 9.13 ± 0.15    |
| 10 mM                | 21.05                                           | 0.701                          | 0.644     | 9.50 ± 0.11    |
| 15 mM                | 20.82                                           | 0.696                          | 0.628     | 9.10 ± 0.17    |

**Table S2** Individual photovoltaic parameters of CdSeTe based QDSCs with addition of different metal salts during ZnS treatment under the illumination of 1 full sun intensity.

|                                   | $J_{sc}$ (mA·cm <sup>-2</sup> ) | $V_{oc}$ (V)  | FF            | PCE (%)     |
|-----------------------------------|---------------------------------|---------------|---------------|-------------|
| Ref                               | 20.96                           | 0.665         | 0.635         | 8.85        |
|                                   | 20.84                           | 0.668         | 0.629         | 8.76        |
|                                   | 21.07                           | 0.671         | 0.640         | 9.05        |
|                                   | 21.01                           | 0.667         | 0.637         | 8.93        |
|                                   | 20.92                           | 0.669         | 0.631         | 8.83        |
| Average                           | 20.96 ± 0.09                    | 0.668 ± 0.002 | 0.634 ± 0.004 | 8.88 ± 0.11 |
| Be(NO <sub>3</sub> ) <sub>2</sub> | 20.74                           | 0.663         | 0.628         | 8.64        |
|                                   | 20.96                           | 0.672         | 0.639         | 9.00        |
|                                   | 20.83                           | 0.670         | 0.634         | 8.85        |
|                                   | 20.79                           | 0.668         | 0.630         | 8.75        |
|                                   | 20.91                           | 0.665         | 0.635         | 8.83        |
| Average                           | 20.85 ± 0.09                    | 0.668 ± 0.004 | 0.633 ± 0.004 | 8.82 ± 0.14 |
| Mg(NO <sub>3</sub> ) <sub>2</sub> | 20.84                           | 0.698         | 0.645         | 9.38        |
|                                   | 20.93                           | 0.705         | 0.637         | 9.40        |
|                                   | 20.99                           | 0.700         | 0.634         | 9.31        |
|                                   | 21.10                           | 0.701         | 0.642         | 9.49        |
|                                   | 21.06                           | 0.696         | 0.640         | 9.38        |
| Average                           | 20.98 ± 0.10                    | 0.700 ± 0.003 | 0.640 ± 0.004 | 9.39 ± 0.06 |
| Ca(NO <sub>3</sub> ) <sub>2</sub> | 21.17                           | 0.699         | 0.628         | 9.29        |
|                                   | 21.04                           | 0.696         | 0.638         | 9.34        |
|                                   | 20.88                           | 0.692         | 0.641         | 9.26        |
|                                   | 20.93                           | 0.694         | 0.632         | 9.18        |
|                                   | 20.97                           | 0.701         | 0.635         | 9.33        |
| Average                           | 21.00 ± 0.11                    | 0.696 ± 0.004 | 0.635 ± 0.005 | 9.28 ± 0.07 |

|                                   |              |               |               |             |
|-----------------------------------|--------------|---------------|---------------|-------------|
| Al(NO <sub>3</sub> ) <sub>3</sub> | 21.17        | 0.668         | 0.630         | 8.91        |
|                                   | 20.95        | 0.671         | 0.638         | 8.97        |
|                                   | 21.13        | 0.673         | 0.634         | 9.02        |
|                                   | 20.84        | 0.671         | 0.637         | 8.91        |
|                                   | 20.97        | 0.667         | 0.635         | 8.88        |
| Average                           | 21.01 ± 0.14 | 0.670 ± 0.002 | 0.635 ± 0.003 | 8.94 ± 0.06 |
| Ga(NO <sub>3</sub> ) <sub>3</sub> | 21.09        | 0.698         | 0.637         | 9.38        |
|                                   | 21.20        | 0.702         | 0.648         | 9.64        |
|                                   | 20.94        | 0.704         | 0.640         | 9.43        |
|                                   | 21.13        | 0.695         | 0.644         | 9.46        |
|                                   | 20.90        | 0.705         | 0.650         | 9.58        |
| Average                           | 21.05 ± 0.13 | 0.701 ± 0.004 | 0.644 ± 0.005 | 9.50 ± 0.11 |

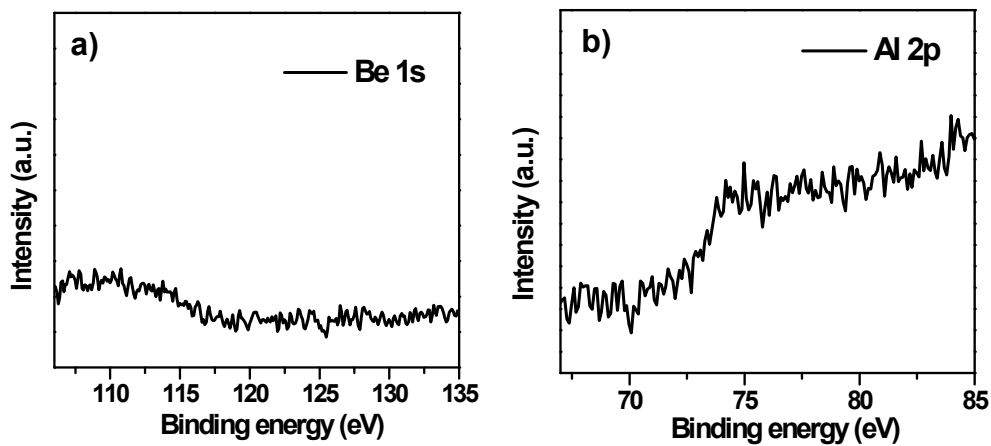

**Fig. S1** X-photoelectron spectra of the QDs sensitized electrodes with  $\text{Be}(\text{NO}_3)_2$  and  $\text{Al}(\text{NO}_3)_3$  modified ZnS treatments: (a) Be 1s and (b) Al 2p signals.
